# Supplementary material for: Investigation on the Interactions between Self-Assembled β-Sheet Peptide Nanofibers and Model Cell Membranes
Source: MDPI journal article supplement (doi:10.3390/ijms21249518), 2020-12-14
Supplement: s1 [file s1]

## Supplementary Material

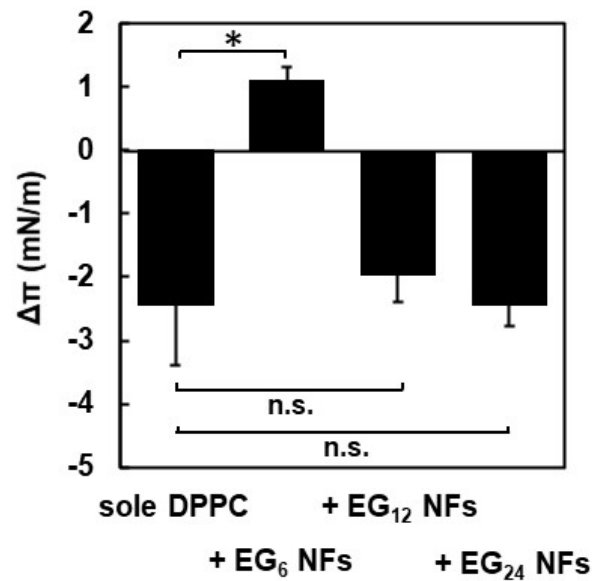

**Figure 1.** Changes in surface pressure of the DPPC membrane 30 min after injection of EG<sub>n</sub> NFs. The  $\Delta\pi$  was calculated by subtracting the surface pressure at 0 min from that at 30 min. The same measurements were repeated three times. The representative data are shown in Figure 3. \* $p < 0.01$ , n.s. = not significant.

**Table 1.** Collapse surface pressures, limiting molecular areas, and maximum elastic moduli determined from  $\pi$ -A isotherms.<sup>a</sup>

|                                                              | DPPC  | EG <sub>6</sub> NFs |             | EG <sub>12</sub> NFs |             | EG <sub>24</sub> NFs |             |
|--------------------------------------------------------------|-------|---------------------|-------------|----------------------|-------------|----------------------|-------------|
|                                                              |       | 1.0 $\mu$ M         | 2.5 $\mu$ M | 1.0 $\mu$ M          | 2.5 $\mu$ M | 1.0 $\mu$ M          | 2.5 $\mu$ M |
| final collapse surface pressure (mN/m)                       | 59.0  | 56.2                | 58.9        | 61.5                 | 58.9        | 56.6                 | 54.0        |
| limiting molecular area at final collapse ( $\text{\AA}^2$ ) | 19.8  | 18.6                | 18.2        | 24.6                 | 20.1        | 23.4                 | 26.5        |
| maximum elastic moduli (mN/m)                                | 137.5 | 66.2                | 48.4        | 68.7                 | 63.1        | 59.8                 | 65.0        |

<sup>a</sup> Collapse surface pressures, limiting molecular areas, and maximum elastic moduli were estimated from Figure 4 and 5.
